# Supplementary material
Source: PubMed Central journal article supplement (PMC4793627)
Supplement: lask015976.wt2_default.pdf [file lask015976.wt2_default.pdf]

| Appendix Table 2. Changes in 30-day Readmission Rates in MA and NY Following Health Care Reform, Age18-64 |                              |                              |                            |                              |                              |                             |                            |                                                           |         |
|-----------------------------------------------------------------------------------------------------------|------------------------------|------------------------------|----------------------------|------------------------------|------------------------------|-----------------------------|----------------------------|-----------------------------------------------------------|---------|
|                                                                                                           | Unadjusted Results           |                              |                            |                              |                              |                             |                            | Adjusted Results                                          |         |
|                                                                                                           | Massachusetts                |                              |                            | NY                           |                              |                             | MA vs. NY                  | Odds of 30-day All-Cause Readmission in MA Relative to NY |         |
| Index Admission Diagnosis                                                                                 | Pre-reform Readmission rate* | Post-reform Readmission rate | Change in Readmission rate | Pre-reform Readmission rate* | Post-reform Readmission rate | Change in Readmission Rates | Difference-in-Differences§ | OR (95% CI)‡                                              | P-value |
| All diagnoses, excluding obstetrical                                                                      | 14.3%                        | 14.5%                        | 0.2%                       | 14.8%                        | 14.8%                        | 0.0%                        | 0.2%                       | 1.03 (1.01-1.04)                                          | 0.0005  |
| Top 5 index admission diagnoses†                                                                          |                              |                              |                            |                              |                              |                             |                            |                                                           |         |
| 1. Mood disorders & Schizophrenia and other psychotic disorders                                           | 18.1%                        | 16.6%                        | -1.5%                      | 18.2%                        | 17.9%                        | -0.3%                       | -1.2%                      | 0.92 (0.87-0.91)                                          | 0.0003  |
| 2. Back problems & Osteoporosis                                                                           | 8.2%                         | 6.8%                         | -1.4%                      | 14.3%                        | 12.3%                        | -2.0%                       | 0.5%                       | 0.97 (0.90-1.05)                                          | 0.5053  |
| 3. Non specified chest pain & Coronary atherosclerosis                                                    | 10.1%                        | 11.4%                        | 1.3%                       | 9.3%                         | 9.5%                         | 0.2%                        | 1.1%                       | 1.12 (1.03-1.21)                                          | 0.002   |
| 4. Substance-related & Alcohol-related disorders                                                          | 14.5%                        | 15.8%                        | 1.3%                       | 25.0%                        | 24.4%                        | -0.5%                       | 1.8%                       | 1.08 (1.01-1.14)                                          | 0.0162  |
| 5. Skin and subcutaneous tissue infections                                                                | 11.3%                        | 10.7%                        | -0.6%                      | 10.0%                        | 9.6%                         | -0.4%                       | -0.2%                      | 1.00 (0.90-1.11)                                          | 0.9353  |

\* Pre-reform period defined as 9/1/2004-6/30/2006; post-reform period defined as 1/1/2008-9/30/2009

† Patient diagnoses categorized by AHRQ's Clinical Classifications Software (CCS)

‡ Adjusted for age, sex, comorbidity, hospital ownership, teaching hospital and nurse-to-census ratio

§ Compare changes of pre- to post-reform between MA and NY where reference is NY; unadjusted
